# Supplementary material
Source: PubMed Central journal article supplement (PMC6176627)
Supplement: pnas.201611612SI.pdf [file pnas.201611612SI.pdf]

# Supporting Information

Uncapher and Wagner 10.1073/pnas.1611612115

**Table S1. Simple WM**

| Task and conditions                                                                                 | <i>N</i>                      | MUI | Metric                         | Refs.               | Finding                                                                          |
|-----------------------------------------------------------------------------------------------------|-------------------------------|-----|--------------------------------|---------------------|----------------------------------------------------------------------------------|
| Change detection task, no distractor trials, across target load (2, 4, 6, 8)<br>•Target load 2 only | 19 HMMs, 22 LMMs              | MUQ | K                              | 6                   | No ME grp                                                                        |
| Change detection task, no distractor trials, across target load (2, 4, 6, 8)<br>•Target load 2 only | 13 HMMs<br>10 LMMs            | MUQ | K                              | 13, Exp. 1          | No ME grp<br>•HMMs numerically lower                                             |
| Change detection task, no distractor trials, across target load (2, 4, 6, 8)<br>•Target load 2 only | 18 HMMs<br>12 LMMs            | MUQ | K                              | 13, Exp. 2          | No ME grp<br>•HMMs numerically lower                                             |
| Change detection task, across distractors (0, 2, 4, 6), target load 2<br>•No distractor trials      | 139 total<br>36 HMMs, 36 LMMs | MUQ | K or <i>d'</i>                 | 11, rectangles task | ME grp: HMMs lower<br>•HMMs numerically lower<br>Neg corr with MMI and <i>d'</i> |
| Change detection task, across distractors (0, 2, 4, 6), target load 2<br>•No distractor trials      | 139 total<br>36 HMMs, 36 LMMs | MUQ | K or <i>d'</i>                 | 11, objects task    | ME grp: HMMs lower<br>•HMMs lower<br>Neg corr with MMI and <i>d'</i>             |
| Change detection task, across distractors (0, 2, 4, 6), target loads 2, 4, 6, 8                     | 60 total<br>12 HMMs, 20 LMMs  | MUQ | <i>d'</i>                      | 14                  | ME grp: HMMs lower                                                               |
| Change detection task, across distractor (0, 2, 4, 6), target load 2                                | 13 HMMs,<br>10 LMMs           | MUQ | K                              | 13, Exp. 1          | ME grp: HMMs lower                                                               |
| Change detection task, across distractor (0, 2, 4, 6), target load 4                                | 13 HMMs,<br>10 LMMs           | MUQ | K                              | 13, Exp. 1          | No ME grp                                                                        |
| Change detection task, across distractor (0, 2, 4, 6), target load 6                                | 13 HMMs,<br>10 LMMs           | MUQ | K                              | 13, Exp. 1          | No ME grp                                                                        |
| Change detection task, across distractor (0, 2, 4, 6), target load 2                                | 18 HMMs,<br>12 LMMs           | MUQ | K                              | 13, Exp. 2          | HMMs numerically lower                                                           |
| Change detection task, across distractor (0, 2, 4, 6), target load 4                                | 18 HMMs,<br>12 LMMs           | MUQ | K                              | 13, Exp. 2          | No ME grp                                                                        |
| Change detection task, across distractor (0, 2, 4, 6), target load 6                                | 18 HMMs,<br>12 LMMs           | MUQ | K                              | 13, Exp. 2          | No ME grp                                                                        |
| Change detection task, across distractor (2, 10), target load 2                                     | 22 HMMs, 20 LMMs              | MUQ | IES ( <i>d'</i> , RT combined) | 12                  | ME grp: HMMs less efficient                                                      |

For all tables effects in bold surpass threshold for significance; effects in italics represent trends; effects in color but not bold represent numerical differences that do not pass threshold for significance. Effects in blue represent where HMMs underperform LMMs; red represents the opposite. Bulleted tests denote nonindependent subtests of the superordinate test. acc, accuracy; FA, false alarm; grp, group; intxn, interaction; ME, main effect; MUI, Media Use Instrument; MUQ, Media Use Questionnaire of ref. 6; neg corr, negative correlation; n.s., not significant. Note that, for the change detection task, Table S1 reports only main effects of group (to assess simple WM differences between groups); interactions between group and distractor load are reported below, in Table S4 (as these interactions assess filtering differences).

**Table S2. Complex WM**

| Task and conditions                   | N                   | MUI                  | Metric        | Refs.      | Finding                                                   |
|---------------------------------------|---------------------|----------------------|---------------|------------|-----------------------------------------------------------|
| AX-CPT without distractors, AX trials | 15 HMMs, 15 LMMs    | MUQ                  | d' or RT      | 6          | No ME grp                                                 |
| AX-CPT without distractors, AX trials | 60 total            | MUQ                  | IES           | 14         | ME grp: HMMs less efficient                               |
| OSPAN                                 | 277 total           | MUQ                  | acc           | 15         | Neg corr with MMI                                         |
| Automated Reading Span                | 221 total           | MUQ                  | acc           | 16         | No ME grp                                                 |
|                                       | 33 HMMs,<br>36 LMMs |                      |               |            |                                                           |
| N-back (2- and 3-back)                | 15 HMMs, 15 LMMs    | MUQ                  | d'            | 6          | Grp*load intxn; HMMs worse on 3-back                      |
| N-back (2- and 3-back)                | 60 total            | MUQ                  | IES           | 14         | ME grp: HMMs worse, no intxn                              |
|                                       | 12 HMMs, 20 LMMs    |                      |               |            |                                                           |
| N-back (2- and 3-back)                | 13 HMMs,<br>10 LMMs | MUQ                  | d'            | 13, Exp. 1 | No ME grp, no intxn                                       |
| N-back (2- and 3-back)                | 17 HMMs,<br>9 LMMs  | MUQ                  | d'            | 13, Exp. 2 | No ME grp, no intxn                                       |
| N-back (2- and 3-back)                | 265 total           | MUQ and modified MUQ | d', omissions | 17         | Neg corr with MMI and d', Pos corr with MMI and omissions |
| N-back (2-, 3-, and 4-back)           | 94 total            | MUQ                  | d'            | 18         | No ME grp, no intxn<br>Null corr with MMI and d'          |
|                                       | 19 HMMs,<br>13 LMMs |                      |               |            |                                                           |
| Backward digit span                   | 22 HMMs, 20 LMMs    | MUQ                  | acc           | 12         | No ME grp                                                 |

**Table S3. Simple and complex WM in adolescents**

| Task and conditions                      | N                   | MUI                | Metric       | Refs. | Finding                           |
|------------------------------------------|---------------------|--------------------|--------------|-------|-----------------------------------|
| N-back                                   | 74 total            | Modified MUQ       | Hits - FAs   | 20    | Neg corr with MMI                 |
| •0-back                                  |                     |                    |              |       | •Neg corr with MMI                |
| •1-back                                  |                     |                    |              |       | •n.s. neg corr with MMI           |
| •2-back                                  |                     |                    |              |       | •Neg corr with MMI                |
| •3-back                                  |                     |                    |              |       | •Neg corr with MMI                |
| Count span                               | 74 total            | Modified MUQ       | acc          | 20    | Neg corr with MMI                 |
| Digit span (across forward and backward) | 523 total           | Modified tween MUQ | Combined acc | 19    | n.s. neg corr with MMI, no ME grp |
|                                          | 51 HMMs,<br>53 LMMs |                    |              |       |                                   |

**Table S4. Managing interference: Filtering**

| Task and conditions                                                             | N                             | MUI          | Metric       | Refs.               | Finding                                                               |
|---------------------------------------------------------------------------------|-------------------------------|--------------|--------------|---------------------|-----------------------------------------------------------------------|
| Change detection task, across distractors (0, 2, 4, 6), target load 2           | 19 HMMs, 22 LMMs              | MUQ          | K            | 6                   | Grp*distractor load intxn, with HMMs more affected by load            |
| Change detection task, across distractors (0, 2, 4), target load 4              | 19 HMMs, 22 LMMs              | MUQ          | K            | 6                   | No grp*distractor load intxn                                          |
| Change detection task, across distractors (0, 2), target load 6                 | 19 HMMs, 22 LMMs              | MUQ          | K            | 6                   | No grp*distractor load intxn                                          |
| Change detection task, across distractors (0, 2, 4, 6), target load 2           | 60 total<br>12 HMMs, 20 LMMs  | MUQ          | K            | 14                  | Numerical grp*distractor load intxn, with HMMs more affected by load  |
| Change detection task, across distractors (2, 10), target load 2                | 22 HMMs, 20 LMMs              | MUQ          | IES          | 12                  | No grp*distractor load intxn                                          |
| Change detection task, across distractors (0, 2, 4, 6), target load 2           | 139 total<br>36 HMMs, 36 LMMs | MUQ          | K or d'      | 11, rectangles task | No grp*distractor load intxn                                          |
| Change detection task, Across Distractors (0, 2, 4, 6), Target load 2           | 139 total<br>36 HMMs, 36 LMMs | MUQ          | K or d'      | 11, objects task    | No grp*distractor load intxn                                          |
| Change detection task, across distractors (0, 2, 4, 6), target load 2           | 13 HMMs,<br>10 LMMs           | MUQ          | K            | 13, Exp. 1          | No grp*distractor load intxn                                          |
| Change detection task, across distractors (0, 2, 4, 6), target load 4           | 13 HMMs,<br>10 LMMs           | MUQ          | K            | 13, Exp. 1          | Grp*distractor load intxn, with LMMs falling to HMM perf at high load |
| Change detection task, across distractors (0, 2, 4, 6), target load 6           | 13 HMMs,<br>10 LMMs           | MUQ          | K            | 13, Exp. 1          | No grp*distractor load intxn                                          |
| Change detection task, across distractors (0, 2, 4, 6), target load 2           | 18 HMMs,<br>12 LMMs           | MUQ          | K            | 13, Exp. 2          | No grp*distractor load intxn                                          |
| Change detection task, across distractors (0, 2, 4, 6), target load 4           | 18 HMMs,<br>12 LMMs           | MUQ          | K            | 13, Exp. 2          | No grp*distractor load intxn                                          |
| Change detection task, across distractors (0, 2, 4, 6), target load 6           | 18 HMMs,<br>12 LMMs           | MUQ          | K            | 13, Exp. 2          | No grp*distractor load intxn                                          |
| AX-CPT with vs. without distractors, AX and BX trials                           | 15 HMMs, 15 LMMs              | MUQ          | RT           | 6                   | Grp*distractor intxn, with HMMs more affected by distraction          |
| AX-CPT with distractors, AX trials                                              | 15 HMMs, 15 LMMs              | MUQ          | RT           | 6                   | ME grp: HMMs slower                                                   |
| AX-CPT with distractors, BX trials                                              | 15 HMMs, 15 LMMs              | MUQ          | RT           | 6                   | ME grp: HMMs slower                                                   |
| AX-CPT with distractors                                                         | 60 total<br>12 HMMs, 20 LMMs  | MUQ          | IES          | 14                  | ME grp: HMMs less efficient                                           |
| AX-CPT with distractors, AX trials                                              | 13 HMMs,<br>10 LMMs           | MUQ          | RT           | 13, Exp. 1          | No grp*distractor intxn<br>No ME grp                                  |
| AX-CPT with distractors, BX trials                                              | 13 HMMs,<br>10 LMMs           | MUQ          | RT           | 13, Exp. 1          | ME grp: HMMs slower                                                   |
| AX-CPT with distractors, AY trials                                              | 13 HMMs,<br>10 LMMs           | MUQ          | RT           | 13, Exp. 1          | No ME grp                                                             |
| AX-CPT with distractors, BY trials                                              | 13 HMMs,<br>10 LMMs           | MUQ          | RT           | 13, Exp. 1          | ME grp: HMMs slower                                                   |
| AX-CPT with distractors, AX trials                                              | 18 HMMs,<br>12 LMMs           | MUQ          | RT           | 13, Exp. 2          | ME grp: HMMs slower                                                   |
| AX-CPT with distractors, BX trials                                              | 18 HMMs,<br>12 LMMs           | MUQ          | RT           | 13, Exp. 2          | No ME grp: HMMs numerically slower                                    |
| AX-CPT with distractors, AY trials                                              | 18 HMMs,<br>12 LMMs           | MUQ          | RT           | 13, Exp. 2          | No ME grp                                                             |
| AX-CPT with distractors, BY trials                                              | 18 HMMs,<br>12 LMMs           | MUQ          | RT           | 13, Exp. 2          | No ME grp                                                             |
| Sentence comprehension while ignoring distracting sentences in another modality | 149 total                     | Tween MUQ    | acc          | 21                  | Neg corr with absolute time spent MM, and trend MMI*distraction       |
| Pip-and-pop                                                                     | 10 HMMs,<br>9 HMMs            | MUQ          | acc          | 24                  | ME grp: HMMs less likely to filter covertly diagnostic info           |
| Flanker (arrows)                                                                | 22 HMMs, 20 LMMs              | MUQ          | IES          | 12                  | ME grp: HMMs worse                                                    |
| Flanker (letter)                                                                | 28 HMMs,<br>28 LMMs           | Modified MUQ | RT, acc, IES | 26                  | No ME grp on RT, acc, or IES                                          |

**Table S5. Managing interference: Proactive interference**

| Task and conditions                | <i>N</i>            | MUI | Metric              | Refs. | Finding                                                                                       |
|------------------------------------|---------------------|-----|---------------------|-------|-----------------------------------------------------------------------------------------------|
| N-back (2- and 3-back),<br>FA rate | 15 HMMs, 15 LMMs    | MUQ | FA rate across task | 6     | HMMs FA'd more in 3- vs. 2-back,<br>and effect increased across task                          |
| Additional singleton               | 21 HMMs,<br>21 LMMs | MUQ | RT                  | 27    | HMMs more primed by color singleton if<br>encountered on n-1 trial (grp*trial position intxn) |
| Recent probes                      | 27 HMMs, 26 LMMs    | MUQ | RT and acc          | 16    | No ME grp; no intxn                                                                           |

**Table S6. Managing interference in adolescents**

| Task and conditions                                   | <i>N</i>            | MUI                | Metric | Refs. | Finding                 |
|-------------------------------------------------------|---------------------|--------------------|--------|-------|-------------------------|
| Visuospatial WM probe (2 targets, 0 or 2 distractors) | 74 total            | Modified MUQ       | acc    | 20    | No MMI*distractor intxn |
| Flanker arrows                                        | 523 total           | Modified tween MUQ | RT     | 19    | Grp*interference intxn  |
| •Incongruent trials                                   | 51 HMMs,<br>53 LMMs |                    |        |       | •HMMs faster            |

**Table S7. Attention**

| Task and conditions                                 | <i>N</i>            | MUI | Metric                            | Refs.       | Finding                                                                                |
|-----------------------------------------------------|---------------------|-----|-----------------------------------|-------------|----------------------------------------------------------------------------------------|
| Metronome response task                             | 73 total            | MUQ | RT variability                    | 29, Exp. 1  | MMI neg corr with sustained attention                                                  |
| Metronome response task                             | 146 total           | MUQ | RT variability                    | 29, Exp. 3a | MMI neg corr with sustained attention                                                  |
| SART                                                | 109 total           | MUQ | A'                                | 29, Exp. 4  | MMI neg corr with sustained attention<br>(attenuated to trend when accounting for age) |
| ANT                                                 | 22 HMMs, 20 LMMs    | MUQ | Alerting, orienting,<br>executive | 16          | No ME grp on any measure                                                               |
| Posner spatial cueing<br>paradigm, dual-cue variant | 33 HMMs,<br>33 LMMs | MUQ | RT                                | 30          | MMI neg corr with speed, further slowed when<br>probe appeared outside cued location   |

**Table S8. Managing task goals: Task switching**

| Task and conditions                                                                      | <i>N</i>                         | MUI | Metric               | Refs.      | Finding                                                                    |
|------------------------------------------------------------------------------------------|----------------------------------|-----|----------------------|------------|----------------------------------------------------------------------------|
| Number–letter task switch, unpredictable switching                                       | 15 HMMs,<br>15 LMMs              | MUQ | RT switch cost       | 6          | ME grp: HMMs greater switch cost                                           |
| Number–letter task switch, unpredictable switching                                       | 13 HMMs,<br>10 LMMs              | MUQ | RT switch cost       | 13, Exp. 1 | ME grp: HMMs greater switch cost                                           |
| Number–letter task switch, unpredictable switching                                       | 19 HMMs,<br>11 LMMs              | MUQ | RT switch cost       | 13, Exp. 2 | HMMs numerically greater switch cost                                       |
| Number–letter task switch, unpredictable switching                                       | 80 total<br>20 HMMs,<br>20 LMMs  | MUQ | RT switch cost       | 31, Exp. 1 | ME grp: HMMs smaller switch cost                                           |
| Number–letter task switch, unpredictable switching                                       | 49 total<br>13 HMMs,<br>13 LMMs  | MUQ | RT switch cost       | 31, Exp. 2 | ME grp: HMMs smaller switch cost                                           |
| Number–letter task switch, unpredictable switching                                       | 221 total<br>33 HMMs,<br>36 LMMs | MUQ | RT switch cost       | 16, Exp. 1 | No ME grp                                                                  |
| Number–letter task switch, unpredictable switching                                       | 60 total<br>12 HMMs,<br>20 LMMs  | MUQ | RT switch cost (IES) | 14         | No ME grp                                                                  |
| Number–letter/Animal–furniture/Plant–transportation task switch, unpredictable switching | 142 total<br>35 HMMs,<br>35 LMMs | MUQ | RT switch cost       | 32         | No ME grp<br>MMI positively related with task<br>set reconfiguration speed |
| Number–letter task switch, predictable switching                                         | 22 HMMs,<br>20 LMMs              | MUQ | RT switch cost       | 16, Exp. 3 | No ME grp                                                                  |
| Number task switch (odd/even or >5/<5),<br>predictable switching                         | 22 HMMs,<br>20 LMMs              | MUQ | RT switch cost (IES) | 12         | No ME grp                                                                  |
| •No attention training HMMs vs. LMMs                                                     | 20 LMMs                          |     | •Overall RT          |            | •HMMs overall less efficient                                               |

**Table S9. Managing task goals: Dual tasking**

| Task and conditions                           | <i>N</i>            | MUI       | Metric | Refs.      | Finding                       |
|-----------------------------------------------|---------------------|-----------|--------|------------|-------------------------------|
| Composing essays while solving anagrams       | 75 total            | MUQ       | acc    | 33         | Null corr with MMI            |
| Number–letter dual task                       | 80 total            | MUQ       | RT     | 31, Exp. 1 | No ME grp, null corr with MMI |
|                                               | 20 HMMs,<br>20 LMMs |           |        |            |                               |
| Sentence comprehension in multiple modalities | 149 total           | Tween MUQ | acc    | 21         | Null corr with MMI            |

**Table S10. Managing task goals in adolescents**

| Task and conditions           | <i>N</i>                         | MUI                | Metric | Ref. | Finding                       |
|-------------------------------|----------------------------------|--------------------|--------|------|-------------------------------|
| Dots–triangles switching task | 523 total<br>51 HMMs,<br>53 LMMs | Modified tween MUQ | acc    | 19   | No ME grp, null corr with MMI |

**Table S11. Inhibitory control**

| Task and conditions       | <i>N</i>                       | MUI          | Metric        | Refs.       | Finding                                                                                                                                          |
|---------------------------|--------------------------------|--------------|---------------|-------------|--------------------------------------------------------------------------------------------------------------------------------------------------|
| SART, impulsivity variant | 76 total                       | MUQ          | RT and errors | 29, Exp. 2  | Null corr with MMI on errors or RT                                                                                                               |
| SART, impulsivity variant | 143 total                      | MUQ          | RT and errors | 29, Exp. 3b | <b>Neg corr with MMI and accuracy (higher MMI shows more errors);</b> n.s. when controlling for age and RT                                       |
| SART, impulsivity variant | 22 HMMs, 20 LMMs               | MUQ          | IES           | 12          | <b>ME grp: HMMs less efficient</b>                                                                                                               |
| Stop-signal task          | 19 HMMs, 22 LMMs               | MUQ          | acc           | 6           | No ME grp                                                                                                                                        |
| Delay discounting task    | 206 total<br>23 HMMs           | MUQ          | K             | 37, Exp. 2  | <b>Neg corr with MMI and delay of gratification (higher MMI shows less delay of gratification) ME grp: HMMs display higher discounting rates</b> |
| Go/no-go task             | 20 LMMs,<br>28 HMMs<br>28 LMMs | Modified MUQ | RT and errors | 26          | No ME grp (although observed grp differences between LMM/HMM and intermediate MM)                                                                |

**Table S12. Relational reasoning**

| Task and conditions   | <i>N</i>                         | MUI | Metric | Refs.      | Finding                                                                               |
|-----------------------|----------------------------------|-----|--------|------------|---------------------------------------------------------------------------------------|
| RPM, standard version | 221 total<br>33 HMMs,<br>36 LMMs | MUQ | acc    | 16, Exp. 1 | <b>ME grp: HMMs worse</b>                                                             |
| RPM, advanced version | 27 HMMs,<br>30 LMMs              | MUQ | acc    | 16, Exp. 2 | <b>ME grp: HMMs worse; attenuated to trend when controlling for motor impulsivity</b> |
| RPM, advanced version | 27 HMMs,<br>30 LMMs              | MUQ | RT     | 16, Exp. 2 | <b>ME grp: HMMs slower;</b> n.s. when controlling for motor impulsivity               |
| RPM                   | 142 total                        | MUQ | acc    | 32         | <b>Neg corr with MMI</b>                                                              |

**Table S13. Explicit and implicit LTM**

| Task and conditions                                  | <i>N</i>                        | MUI | Metric               | Refs.            | Finding                                                                              |
|------------------------------------------------------|---------------------------------|-----|----------------------|------------------|--------------------------------------------------------------------------------------|
| Explicit recognition memory test, target objects     | 139 total<br>36 HMMs, 36 LMMs   | MUQ | <i>d'</i>            | 11, objects task | <b>ME grp: HMMs worse</b>                                                            |
| Explicit recognition memory test, distractor objects | 139 total<br>36 HMMs, 36 LMMs   | MUQ | <i>d'</i>            | 11, objects task | <b>HMMs numerically worse</b>                                                        |
| Implicit contextual cueing task                      | 94 total<br>19 HMMs,<br>13 LMMs | MUQ | RT benefit over time | 18               | <b>ME grp: HMMs worse (did not benefit from contextual cueing) Neg corr with MMI</b> |

**Table S14. LTM in adolescents**

| Task and conditions              | <i>N</i> | MUI          | Metric | Ref. | Finding            |
|----------------------------------|----------|--------------|--------|------|--------------------|
| Implicit weather prediction task | 74 total | Modified MUQ | acc    | 20   | Null corr with MMI |
